# Supplementary material for: Assessment of Knowledge, Attitude, and Utilization of Traditional Medicine among the Communities of Debre Tabor Town, Amhara Regional State, North Central Ethiopia: A Cross-Sectional Study
Source: Evid Based Complement Alternat Med. 2020 Mar 10;2020:6565131. doi: 10.1155/2020/6565131 (PMC7085823; doi:10.1155/2020/6565131)
Supplement: Supplementary Materials — KAP study data generated or analyzed during this study. [file 6565131.f1.xlsx]

## Sheet: KAP data ready for analysis
Age	Sex	Education	Religion	Ethinicity	Occupation	Monthly family inome	Marital status	Family size	Have you ever heard of TM?	Are traditional medicines accessible with affordable cost in the community?	Is health education about risks and benefits of TMs important?	Are none sterile TMs harmful when given by injection?	Are traditional medicines more effective and safer than modern health services?	Do traditional medicines produce less adverse effect compared to MM?	Knoledge score	Do you recommend The use of TM in the community?	Do you believe that TMs are still accepted, available in affordable cost in the community?	Do you believe that breaking secrecy of TMs may lead to loss of its effectiveness?	Do you support integration of MM with TM to improve health care coverage?	Do you believe that TMs can cure some diseases that can’t be treated by MM?	Do you think that if TMs are formulated in modern dosage form is good to treat disease with appropriate dose and route?	Have you used herbal medicines either by yourself or visited traditional healer at least once in your lifetime for treatment?	Do you have plans to use TM in the future?	Have you encountered any adverse effect?
29	1	6	1	1	1	2300	1	2	1	1	2	1	2	1	4	1	2	2	2	2	2	1	2
34	1	6	1	1	1	3000	1	2	1	1	2	1	2	1	4	1	2	2	1	2	2	1	2
40	1	1	1	1	3	4000	1	4	2	2	1	2	1	2	2	2	1	2	1	2	1	1	1	2
27	1	6	1	1	1	2300	1	2	1	1	1	1	2	1	5	1	2	2	2	2	2	1	2
31	1	6	1	1	1	4000	1	4	1	1	1	1	2	1	5	2	2	2	1	2	2	1	2
34	1	5	1	1	3	5000	1	4	1	1	1	1	2	1	5	2	2	2	2	2	2	2	2
36	1	5	1	1	4	2000	1	4	1	1	1	1	2	1	5	2	2	2	1	2	2	2	2
29	1	6	1	1	1	2500	1	5	1	1	2	1	2	1	4	2	2	2	2	2	2	2	2
22	1	6	1	1	1	3000	1	3	1	1	1	1	2	1	5	2	2	2	1	2	2	2	2
32	1	6	1	1	1	3900	1	4	1	1	2	1	1	1	5	1	2	2	2	2	2	1	1	1
29	1	6	1	1	1	3000	1	2	1	1	1	1	2	1	5	1	2	2	2	2	2	2	2
30	1	6	1	1	1	2800	1	3	1	1	1	1	2	1	5	2	2	2	1	2	2	1	2
37	1	2	1	1	3	3000	1	3	2	2	1	2	2	2	1	1	2	2	2	2	2	2	2
32	1	6	1	1	4	7000	1	5	1	1	1	1	2	1	5	2	2	2	1	2	2	1	2
34	1	6	1	1	1	2300	1	1	1	1	1	1	2	1	5	1	2	2	2	2	2	1	2
32	1	6	1	1	1	2300	1	1	1	1	1	1	2	1	5	2	2	2	1	2	1	1	2
40	1	5	1	1	1	1200	1	4	1	1	1	1	2	1	5	2	2	2	2	2	2	1	2
32	1	6	1	1	1	3200	1	4	1	1	1	1	2	1	5	1	2	2	1	2	2	1	2
28	1	6	1	1	1	1200	3	2	1	1	1	1	2	1	5	2	2	2	2	2	1	1	1	2
32	1	6	1	1	1	5600	1	2	1	2	1	1	1	1	5	1	1	1	2	2	1	1	1	2
40	1	5	1	1	2	600	1	1	1	2	1	1	2	1	4	2	1	1	1	1	1	1	1	2
37	1	1	1	1	2	250	2	4	1	1	1	1	1	1	6	1	1	2	2	2	1	1	1	1
45	1	6	1	1	1	4120	1	4	1	1	1	1	1	1	6	2	1	1	1	2	1	1	1	2
48	1	1	1	1	3	6000	1	3	1	1	1	1	2	1	5	2	2	2	2	1	1	1	1	2
30	1	6	1	1	1	1500	3	2	1	1	1	1	2	1	5	1	2	2	2	2	2	1	2
42	1	5	1	1	4	1800	4	3	2	2	1	2	2	2	1	1	2	2	2	2	1	1	1	1
58	1	1	1	1	3	800	3	2	1	1	1	1	2	1	5	2	1	2	1	2	1	1	1	2
37	1	1	1	1	3	600	1	7	2	2	1	2	2	2	1	1	1	2	2	2	1	1	1	2
58	1	1	1	1	3	400	1	3	1	1	1	2	2	2	3	2	1	1	1	2	1	1	1	2
49	1	4	1	1	2	300	3	4	1	1	1	1	2	1	5	1	2	2	2	2	1	1	1	2
38	2	5	1	1	2	2500	1	4	1	1	1	1	2	1	5	1	1	2	1	2	1	1	1	1
53	1	2	1	1	2	240	4	2	2	1	1	2	2	2	2	2	1	2	2	2	1	1	1	2
36	1	1	1	1	3	900	1	6	1	2	1	1	2	1	4	1	2	2	2	2	2	1	1	2
42	1	2	1	1	4	250	4	3	1	1	1	1	2	1	5	2	2	2	2	2	2	1	1	2
33	1	1	1	1	2	2500	1	5	1	1	1	1	2	1	5	2	2	2	1	2	2	1	1	2
28	1	6	1	1	3	650	1	4	1	1	1	1	2	1	5	2	2	2	2	2	1	1	1	2
28	1	6	1	1	1	4500	1	5	1	2	1	1	1	1	5	2	1	1	1	2	1	1	1	2
37	1	1	1	1	2	400	2	2	2	2	1	2	1	2	2	1	1	1	1	2	1	1	1	2
61	1	2	1	1	3	1000	1	2	1	2	1	2	1	2	3	2	1	1	1	1	1	1	1	2
34	1	6	1	1	1	3100	1	3	1	1	1	1	2	1	5	2	2	1	1	2	1	1	1	1
65	1	4	1	1	2	600	2	3	1	1	1	1	1	1	6	2	1	1	2	1	1	1	1	2
33	2	6	1	1	1	1305	1	1	1	1	1	1	1	1	6	1	1	2	1	2	1	1	1	2
39	1	5	1	1	3	1798	1	3	1	1	1	1	2	1	5	2	2	2	2	2	1	1	1	1
30	1	6	1	1	1	1525	1	1	1	1	1	1	2	1	5	2	1	2	1	2	1	1	1	2
29	1	3	1	1	1	2197	4	3	1	1	1	1	2	1	5	1	2	2	2	2	1	1	1	1
22	1	5	1	1	4	1800	1	4	1	1	1	1	2	1	5	2	2	2	2	1	1	1	1	2
48	2	6	1	1	1	3485	1	5	1	1	1	1	2	1	5	2	2	2	2	1	1	1	1	2
43	1	2	1	1	3	850	4	5	1	1	2	1	2	1	4	1	2	2	2	2	1	1	1	1
28	2	6	1	1	1	2008	1	4	1	1	1	1	2	1	5	2	1	1	1	2	1	1	1	2
72	1	1	1	1	3	1000	3	3	1	1	1	1	2	1	5	2	2	2	2	2	1	1	1	1
41	1	5	1	1	1	2514	1	2	1	1	1	1	2	1	5	2	2	2	1	1	1	1	1	2
53	1	4	1	1	3	1800	4	1	1	2	1	1	2	1	4	1	2	2	2	2	1	1	1	2
21	1	2	1	1	3	250	1	2	1	1	1	1	2	1	5	1	2	2	1	2	1	1	2
28	1	6	1	1	1	427	3	1	1	1	1	1	2	1	5	2	2	2	2	1	1	1	2
38	1	5	1	1	1	2866	1	3	1	1	1	1	2	1	5	1	2	2	1	1	1	1	2
42	1	6	1	1	2	3690	2	1	1	1	1	1	2	1	5	1	2	2	2	1	1	1	2
36	1	6	1	1	1	3329	2	1	1	1	1	1	2	1	5	2	2	2	2	1	1	1	2
31	1	6	1	1	1	2300	1	4	1	1	1	1	1	1	6	2	1	2	1	2	1	1	2
25	1	5	1	1	3	1500	3	3	1	1	1	1	2	1	5	1	2	2	2	1	1	1	2
25	1	6	1	1	1	1000	3	2	1	1	2	1	1	1	5	2	2	2	2	2	2	2	2
19	1	5	1	1	6	400	1	1	1	1	2	1	2	1	4	2	2	2	1	2	1	1	1	1
23	1	4	1	1	2	200	3	2	2	1	1	2	1	2	3	2	1	1	1	2	1	1	1	2
38	1	5	1	1	1	2008	1	5	2	2	1	2	1	2	2	1	1	1	1	2	1	1	1	2
23	1	4	1	1	1	1200	3	3	1	1	1	1	2	1	5	2	2	1	2	2	1	1	1	2
35	1	1	1	1	2	150	4	5	1	1	1	1	2	1	5	2	2	2	1	2	2	2	2
30	1	6	1	1	1	1700	1	2	1	1	1	1	2	1	5	2	2	2	2	2	2	1	2
27	1	3	1	1	2	1200	3	1	1	2	1	1	2	1	4	1	2	2	1	2	2	1	1	1
39	2	5	1	1	4	3000	1	5	1	1	1	1	2	1	5	2	2	2	1	2	2	1	1	2
36	2	5	1	1	1	2800	1	2	1	1	2	1	1	1	5	2	1	2	2	2	2	2	2
24	2	6	1	1	1	5000	1	4	1	1	2	1	2	1	4	2	2	2	2	1	2	1	2
27	1	6	1	1	1	2400	1	4	1	1	2	1	2	1	4	2	1	2	1	2	2	2	2
24	1	3	1	1	2	1300	3	3	1	1	2	1	2	1	4	2	2	2	1	1	2	2	2
39	1	1	1	1	3	600	1	4	2	1	1	2	2	2	3	2	1	2	1	2	2	2	2
47	2	1	1	1	4	3100	1	6	1	1	1	1	2	1	4	1	1	2	1	1	1	2	1	1
38	1	5	1	1	2	1700	1	5	1	1	1	1	1	1	6	2	2	2	2	1	2	1	2
44	2	6	1	1	1	3400	1	2	1	1	1	1	2	1	5	2	2	2	2	2	2	1	2
60	2	5	4	1	4	4000	1	2	1	1	1	1	1	1	6	2	1	2	1	2	1	1	1	2
38	2	4	1	1	6	1800	1	2	1	1	1	1	2	1	5	2	2	1	1	2	1	1	1	2
33	2	6	1	1	4	10000	1	4	1	1	1	1	2	1	5	2	2	2	1	2	2	1	2
30	2	6	1	1	1	3001	1	2	2	2	1	2	2	2	2	1	2	2	1	2	2	1	2
42	2	6	1	1	1	3470	1	2	1	1	1	1	2	1	5	2	2	2	2	2	2	1	2
30	1	6	1	1	1	3001	1	4	1	1	1	1	2	1	5	2	2	2	2	2	2	1	2
24	1	5	1	1	2	250	3	1	1	1	1	1	2	1	5	1	2	2	2	2	2	1	2
39	2	4	4	1	4	5000	1	2	1	1	1	1	2	1	5	2	2	2	1	2	1	1	1	2
33	1	3	1	1	3	3440	1	4	1	1	1	1	2	1	5	2	2	2	2	2	2	1	2
28	1	6	1	1	1	1916	1	2	1	1	1	1	2	1	5	1	2	2	2	2	2	1	2
28	1	5	1	1	5	300	1	1	1	1	1	1	2	1	5	2	2	2	2	2	2	1	2
57	1	1	1	1	3	4500	1	4	1	1	1	1	2	1	5	2	2	2	2	2	2	1	2
30	1	6	1	1	1	2872	1	2	1	1	1	1	2	1	5	1	2	2	1	2	2	2	2
33	2	4	1	1	1	2000	1	7	1	1	1	1	2	1	5	2	2	2	2	2	2	1	2
40	1	6	1	1	1	2514	1	5	1	1	1	1	2	1	5	2	2	2	1	2	2	1	2
45	2	1	1	1	2	1000	4	3	1	1	1	1	2	1	5	2	2	2	2	2	2	1	2
49	1	4	1	1	3	1916	1	6	1	1	1	1	2	1	5	2	1	2	1	2	1	1	1	1
41	1	2	1	1	3	2450	1	3	1	1	1	1	2	1	5	2	2	2	2	2	2	1	2
52	2	4	1	1	6	2000	1	2	1	1	1	1	2	1	5	1	2	2	1	2	2	1	1	1
22	1	5	1	1	5	300	3	1	1	1	1	1	2	1	15	2	2	2	2	2	2	2	2
53	2	4	1	1	2	1200	1	6	2	2	1	2	2	2	1	2	1	2	1	2	1	1	1	2
28	1	6	1	1	1	2008	1	2	1	1	1	1	2	1	5	2	2	2	1	2	2	1	2
47	2	6	1	1	1	3001	1	7	1	1	1	1	1	1	6	2	2	2	2	2	2	1	2
36	1	2	1	1	3	2300	1	6	1	1	1	1	2	1	5	1	2	2	2	2	2	1	1	1
34	1	6	1	1	1	2514	1	5	1	1	1	1	2	1	5	2	2	2	1	2	2	1	2
21	1	5	1	1	5	300	1	1	1	1	2	1	2	1	4	2	2	2	2	2	2	2	2
44	1	4	1	1	3	4000	1	2	1	1	1	1	2	1	5	2	1	2	1	2	1	1	1	2
40	1	6	1	1	1	3400	1	8	1	1	1	1	2	1	5	1	2	2	1	2	2	1	2
18	1	5	1	1	5	300	3	1	1	1	1	1	2	1	5	2	2	2	2	2	2	2	2
57	1	6	1	1	1	5000	4	4	2	2	1	2	2	2	1	2	1	2	1	2	1	1	2
23	1	6	1	1	5	300	3	1	1	1	1	1	2	1	5	2	2	2	1	2	2	1	2
21	1	6	1	1	3	3000	1	3	1	1	1	1	1	1	6	1	2	1	2	1	1	1	1	2
37	2	6	1	1	1	2500	1	5	1	1	1	1	1	1	6	2	1	1	1	2	2	1	1	1
27	1	3	1	1	2	1500	1	2	1	1	1	1	2	1	5	1	1	1	2	1	2	2	2
27	1	5	1	1	1	1900	1	2	2	1	2	2	1	2	2	2	1	1	1	2	2	2	2
31	2	5	1	1	1	2000	1	4	1	1	1	1	1	1	6	1	1	1	1	1	1	1	1	1
21	1	6	1	1	2	400	1	4	1	1	1	1	2	1	5	2	1	1	2	2	1	1	1	1
31	1	6	1	1	1	3100	1	5	2	1	1	2	1	2	3	1	1	1	1	2	1	2	1	1
41	1	2	1	1	2	3000	1	8	1	1	1	1	1	1	6	1	1	1	2	1	1	1	1	1
37	2	2	1	1	2	2500	2	6	1	1	2	1	1	1	5	1	1	1	1	2	2	1	2
21	1	3	1	1	2	1600	1	4	1	1	1	1	1	1	6	1	1	1	2	2	2	1	2
26	1	3	1	1	3	1500	1	5	1	1	2	1	1	1	5	2	2	1	1	2	1	1	1	1
31	1	3	1	1	2	2000	1	4	1	1	1	1	2	1	5	2	1	1	2	2	2	1	1	2
37	1	1	1	1	3	2000	1	4	1	1	1	1	1	1	6	2	2	1	2	1	2	2	2
31	1	6	1	1	2	1800	1	4	1	1	1	1	1	1	6	1	1	2	2	2	2	1	2
32	1	6	1	1	4	1500	1	5	1	1	2	1	2	1	4	2	1	1	1	2	2	2	2
29	1	6	1	1	4	2000	1	8	1	1	2	1	1	1	5	1	1	1	1	2	2	2	1	2
32	1	3	1	1	3	1700	1	7	1	1	2	1	1	1	5	2	2	1	2	1	2	2	1	2
36	1	3	1	1	3	2500	1	5	1	1	1	1	2	1	5	2	1	1	1	2	2	1	2
37	1	2	1	1	2	2700	1	2	1	1	2	1	1	1	5	2	1	1	2	1	1	1	1	1
32	1	1	1	1	3	1800	1	1	1	1	1	1	1	1	6	2	1	2	1	2	2	1	1	2
31	2	3	1	1	4	1900	1	4	1	1	1	1	2	1	5	2	1	1	1	2	2	2	2
34	1	6	1	1	1	1800	1	6	1	1	1	1	2	1	5	1	2	2	2	2	2	1	2
19	2	5	1	1	4	2000	1	3	1	1	1	1	2	1	5	2	2	2	2	2	2	1	2
41	1	4	1	1	3	2000	1	6	1	1	1	1	2	1	5	2	1	2	1	2	2	1	2
21	1	6	1	1	3	1780	1	5	1	1	1	1	2	1	5	1	2	2	2	2	2	1	2
21	1	5	1	1	2	1500	4	4	1	1	1	1	2	1	5	2	2	2	2	2	2	1	2
27	2	6	1	1	2	900	3	6	1	1	1	1	2	1	5	2	2	2	1	2	2	1	2
43	2	6	1	1	1	3000	1	4	1	1	1	1	2	1	5	2	2	2	2	2	2	1	2
60	2	6	1	1	4	1000	1	2	1	1	1	1	2	1	5	1	2	2	2	2	1	1	2
19	1	5	1	1	5	300	3	1	1	1	1	1	1	1	6	2	2	2	1	2	2	1	2
31	2	6	1	1	2	3000	1	4	1	1	1	1	2	1	5	2	2	2	2	2	2	1	2
24	1	3	1	1	2	1700	3	4	1	1	1	1	1	1	6	2	2	1	1	2	1	1	2
27	2	6	1	1	1	1700	1	1	1	1	1	1	1	1	6	1	1	1	1	2	1	1	2
25	2	6	1	1	3	1800	3	5	2	2	2	2	2	2	0	2	2	2	2	2	2	2	2
33	1	4	1	1	3	3000	1	5	1	1	1	1	2	1	5	2	2	2	2	2	2	1	2
22	1	3	1	1	3	1200	1	5	1	2	1	1	2	1	4	1	2	2	2	2	2	1	2
21	1	6	1	1	4	900	4	4	2	2	2	2	2	2	0	2	2	2	1	2	2	2	2
32	1	5	1	1	4	1800	1	4	1	1	1	1	2	1	5	2	1	2	2	2	2	2	2
69	2	4	1	1	2	800	4	2	1	1	1	1	2	1	5	1	2	2	2	2	2	1	1	1
28	1	5	1	1	3	450	1	4	1	1	1	1	2	1	5	2	2	2	1	2	2	2	1	1
37	1	6	1	1	1	2746	2	2	1	1	1	1	2	1	5	2	2	2	2	2	2	1	1	1
21	1	4	1	1	2	150	1	4	2	2	1	2	2	2	1	2	2	2	2	2	1	1	2
43	1	5	1	1	4	950	4	5	1	1	1	1	2	1	5	1	2	2	1	2	1	1	2
22	1	6	1	1	1	2305	3	3	1	1	1	1	2	1	5	2	2	2	2	1	1	1	2
37	1	2	1	1	4	451	1	3	1	1	1	1	2	1	5	2	1	1	1	2	1	1	2
29	1	3	1	1	1	3425	1	4	1	1	1	1	2	1	5	2	2	2	1	1	2	2	2
25	1	6	1	1	1	1000	3	1	1	1	1	1	1	1	6	1	2	2	2	2	2	2	2
55	1	2	1	1	2	2300	1	7	2	2	1	2	2	2	1	2	2	2	2	2	1	1	2
48	1	1	1	1	2	1200	4	5	1	1	1	1	2	1	5	2	2	2	2	2	2	1	1	1
26	1	6	1	1	1	1687	1	3	1	2	1	1	2	1	4	2	2	1	2	2	1	1	2
42	2	6	1	1	1	3425	1	6	1	1	1	1	2	1	5	2	2	2	2	2	1	1	2
37	1	4	1	1	2	1200	4	3	1	1	1	1	2	1	5	2	2	2	2	2	2	2	2
26	1	5	1	1	2	1000	3	3	1	1	2	1	2	1	4	2	2	2	1	2	2	1	1	1
41	1	2	1	1	3	3000	1	4	2	2	1	2	2	2	1	2	2	2	2	2	2	1	2
35	1	6	1	1	1	3000	1	2	1	1	1	1	2	1	5	1	2	2	2	2	2	1	2
32	1	6	1	1	1	2300	1	2	2	2	1	2	2	2	1	2	2	2	1	2	2	1	2
30	1	6	1	1	1	2000	1	2	1	2	1	1	2	1	4	2	1	1	1	2	1	1	1	2
29	1	3	1	1	2	1800	2	6	1	1	2	1	2	1	4	2	2	2	2	2	2	2	2
33	1	6	1	1	1	1700	1	6	1	2	1	1	2	1	4	2	1	1	1	2	1	1	1	2
30	2	6	1	1	2	1200	1	1	1	1	1	1	1	1	6	1	1	1	1	2	1	1	2
37	1	6	1	1	1	2500	1	4	1	1	1	1	2	1	5	2	2	2	2	2	2	1	2
47	1	2	1	1	2	1000	1	2	1	1	1	1	1	1	6	2	1	1	2	2	1	1	1	2
27	1	6	1	1	2	800	1	3	1	2	1	1	1	1	6	2	1	1	1	2	1	1	1	2
21	2	5	1	1	2	2000	3	1	1	1	1	1	1	1	6	2	2	2	2	2	1	1	2
27	2	6	1	1	4	3000	1	2	1	1	1	1	1	1	6	1	2	2	1	2	2	1	2
21	1	6	1	1	2	800	1	3	1	1	1	1	2	1	5	2	1	1	2	2	1	1	2
35	2	6	1	1	2	2500	1	1	1	1	1	1	1	1	6	2	1	2	1	2	1	1	1	2
28	1	5	1	1	3	5000	1	3	1	1	1	1	2	1	5	1	2	2	2	2	2	1	2
35	1	2	1	1	3	2500	1	5	1	1	1	1	2	1	5	2	2	2	1	2	2	1	2
37	1	5	1	1	3	10000	1	7	1	1	1	1	2	1	5	2	1	1	1	2	2	1	1	2
29	1	6	1	1	3	1200	1	2	1	2	2	1	1	1	4	1	2	2	2	2	1	2	1	1
40	1	1	1	1	3	1700	1	6	2	2	1	2	1	2	2	2	1	1	1	2	1	1	1	2
37	2	6	1	1	2	3000	1	2	2	2	2	2	1	2	1	1	1	1	1	2	1	1	1	2
28	1	5	1	1	2	1800	3	4	1	1	1	1	2	1	5	1	2	2	2	2	2	1	2
34	1	3	1	1	2	800	1	1	1	1	1	1	2	1	5	2	2	2	2	2	1	1	1	1
44	2	5	1	1	4	4000	1	7	1	1	1	1	2	1	5	2	2	2	2	2	2	1	2
55	2	6	1	1	6	600	1	2	1	1	1	1	2	1	5	1	2	2	2	2	2	1	2
36	2	6	1	1	1	1500	2	1	2	1	2	2	1	2	2	2	1	1	1	2	1	1	1	2
31	1	2	1	1	3	2000	1	4	1	2	1	1	1	1	5	2	1	1	1	2	1	1	1	2
34	1	5	1	1	3	1500	1	3	1	2	1	1	2	1	4	1	1	1	2	2	1	1	1	1
31	1	6	1	1	1	2100	1	4	1	1	2	1	1	1	5	2	1	1	1	2	1	2	1	2
32	1	2	1	1	4	2000	4	2	1	1	1	1	2	1	5	2	2	2	2	2	1	1	1	2
32	1	2	1	1	4	3000	1	5	1	1	1	1	2	1	5	1	2	2	2	2	2	1	2
39	1	5	1	1	3	7000	1	5	1	1	1	1	2	1	5	2	2	2	2	2	2	1	2
37	1	3	1	1	4	5000	1	4	1	2	1	1	2	1	4	2	2	2	2	2	2	1	1	2
42	2	1	1	1	4	4000	1	6	1	1	1	1	2	1	5	1	2	2	2	2	2	1	2
50	1	1	1	1	3	2000	1	5	1	1	1	1	2	1	5	2	1	1	1	2	1	1	1	2
27	2	5	1	1	2	2000	1	4	1	1	1	1	1	1	6	2	2	2	2	2	2	2	2
31	1	6	1	1	2	2700	1	4	1	1	1	1	1	1	6	2	2	2	2	2	1	1	2
33	1	5	1	1	3	3001	1	2	1	1	2	1	2	1	4	1	2	2	2	2	2	1	1	2
36	2	6	1	1	4	3465	1	2	1	1	1	1	1	1	5	2	2	1	2	1	1	1	2
42	1	1	1	1	3	3400	1	6	1	1	2	1	2	1	4	2	2	2	2	1	2	1	1	2
26	1	5	1	1	3	1000	1	3	2	2	2	2	2	2	0	1	1	1	1	2	2	1	1	2
26	1	6	1	1	2	2872	1	2	2	2	2	2	1	2	1	2	1	2	1	2	2	1	2
25	1	6	1	1	1	1916	1	3	1	1	1	1	2	1	5	2	2	2	2	1	2	1	1	2
26	1	6	1	1	1	2872	1	3	1	2	1	1	1	1	5	2	1	1	2	2	1	1	2
32	1	6	1	1	1	2008	1	2	1	1	1	1	2	1	5	2	2	2	1	2	2	1	2
26	1	6	1	1	1	1916	1	2	1	1	1	1	2	1	5	2	2	2	2	1	2	1	2
28	1	6	1	1	2	2872	1	3	1	2	2	1	2	1	3	1	2	1	1	2	1	1	1	2
30	1	6	1	1	3	6000	1	4	1	1	1	1	2	1	5	2	2	2	2	2	2	2	2
27	1	6	1	1	1	3000	1	2	1	1	1	1	2	1	5	1	2	2	1	2	2	2	2
32	1	6	1	1	1	3000	1	2	1	1	1	1	2	1	5	2	2	2	2	2	2	2	2
30	1	6	1	1	1	3500	1	4	2	2	2	2	2	2	0	2	2	2	1	2	2	2	2
29	1	6	1	1	1	2300	1	3	1	1	2	1	2	1	4	2	2	2	2	2	2	2	2
28	1	5	1	1	3	2000	1	2	1	1	2	1	2	1	4	2	2	2	2	2	2	2	2
40	1	2	1	1	1	3000	1	4	2	2	1	2	1	2	3	2	1	1	1	2	1	1	1	2
31	1	6	4	1	1	3000	1	3	1	1	2	1	2	1	4	1	2	2	2	2	2	2	2
32	1	6	1	1	1	3900	1	3	1	1	1	1	2	1	5	2	2	2	1	2	2	2	2
24	1	6	1	1	1	1600	3	1	1	1	1	1	2	1	5	2	2	2	2	2	2	2	2
27	1	6	1	1	1	2000	3	1	1	1	1	1	2	1	5	2	2	2	2	2	2	2	2
51	1	1	1	1	3	5000	1	6	2	2	1	2	1	2	2	1	1	1	2	2	1	1	1	2
29	1	6	1	1	1	2882	1	3	1	1	2	1	2	1	4	2	2	2	2	2	2	1	2
34	1	6	1	1	1	3900	1	2	2	2	2	2	2	2	0	2	2	2	2	2	2	1	2
29	1	6	1	1	1	3900	1	3	1	1	1	1	2	1	5	2	2	2	1	2	2	1	2
40	1	2	1	1	2	900	1	1	2	2	1	2	2	2	1	1	1	2	2	1	2	1	1	2
42	2	2	1	1	2	700	1	3	2	2	1	2	2	2	1	2	1	2	2	1	2	1	2
32	1	6	1	1	1	2000	1	2	1	1	1	1	2	1	5	2	2	2	1	2	2	1	2
29	1	6	1	1	1	1900	1	3	1	1	1	1	2	1	5	1	2	2	2	2	2	2	2
29	1	6	1	1	1	2300	1	3	2	2	1	2	2	2	1	2	2	2	2	2	2	1	2
44	2	6	1	1	4	10000	1	5	2	2	1	2	1	2	2	2	1	1	1	2	1	1	1	2
25	1	1	1	1	3	400	1	2	2	2	2	2	2	2	0	1	2	2	2	2	2	1	2
35	1	1	1	1	2	600	1	3	2	2	1	2	2	2	1	2	2	2	2	2	2	2	2
54	1	6	1	1	1	2000	1	4	1	1	1	1	2	1	5	2	2	2	2	2	1	1	2
27	1	1	1	1	2	700	4	3	2	1	2	2	2	2	1	1	2	2	1	2	2	1	2
38	1	2	1	1	3	900	4	3	1	1	1	1	1	1	6	2	2	2	2	2	2	1	2
22	1	5	1	1	5	400	3	1	1	2	2	1	1	1	4	2	1	1	1	2	1	1	2
28	1	5	1	1	2	700	1	2	2	2	1	2	1	2	2	1	1	1	2	1	2	1	2
28	1	2	4	1	3	800	1	4	2	1	1	2	2	2	2	2	2	2	1	2	2	1	2
33	1	1	1	1	2	800	4	2	1	1	1	1	2	1	5	2	2	2	2	1	1	1	2
40	1	4	1	1	2	700	4	5	1	2	1	1	1	1	5	2	2	1	1	1	1	1	1	2
34	1	4	1	1	2	300	1	1	1	1	1	1	1	1	6	1	2	2	2	1	2	1	2
36	2	5	1	1	1	940	1	5	2	2	2	2	2	2	0	2	2	2	2	2	2	1	2
25	1	6	1	1	2	1300	1	3	1	1	1	1	1	1	6	1	2	2	1	2	1	1	2
28	1	6	1	1	1	1500	1	7	1	1	1	1	2	1	5	2	2	2	2	1	1	1	2
28	1	6	1	1	1	2514	1	2	1	2	1	1	2	1	4	2	2	1	1	1	2	1	2
21	1	5	1	1	2	800	4	2	2	2	1	2	1	2	2	2	1	1	1	2	1	1	1	2
26	1	5	1	1	3	1400	1	4	1	2	1	1	2	1	4	1	2	2	2	1	1	1	1	2
60	1	1	1	1	2	800	4	2	2	1	1	2	2	2	2	2	1	2	1	1	1	1	1	2
32	1	3	1	1	1	1800	1	3	1	1	1	1	1	1	6	2	2	1	2	1	1	1	2
40	1	5	1	1	4	500	1	5	1	1	1	1	2	1	5	2	2	2	2	1	1	1	1	2
55	2	1	1	1	2	800	1	4	1	2	1	1	1	1	5	1	1	2	1	1	1	1	2
24	2	6	1	1	2	1600	1	3	1	1	1	1	1	1	6	2	2	2	1	1	1	1	1	2
37	1	2	1	1	3	3000	1	4	1	2	1	1	1	1	5	1	2	2	2	1	1	1	1	2
30	2	6	1	1	4	1000	1	6	1	1	1	1	2	1	5	2	1	2	1	1	1	1	1	2
31	1	6	1	1	1	3001	1	7	1	2	1	1	2	1	4	2	1	2	1	2	1	1	1	2
48	2	6	1	1	1	3000	1	5	1	2	1	1	2	1	4	1	1	2	1	2	1	1	1	2
30	1	6	1	1	1	500	1	2	1	1	1	1	1	1	6	2	2	2	2	2	1	1	1	2
54	2	6	1	1	1	3000	1	7	1	1	1	1	2	1	5	2	2	2	1	1	1	1	1	2
20	1	5	1	1	5	400	3	1	1	1	1	1	2	1	5	1	1	2	2	2	1	1	1	2
26	2	2	1	1	2	2000	1	5	1	2	1	1	1	1	5	2	2	1	1	2	1	1	2
62	1	1	1	1	2	600	4	2	1	2	1	1	2	1	4	2	2	1	2	1	1	1	2
71	2	1	1	1	2	1200	1	4	1	2	1	1	2	1	4	2	2	1	1	1	1	1	2
27	2	4	1	1	2	900	1	3	1	1	1	1	2	1	5	1	2	2	1	1	1	1	2
25	1	6	1	1	2	400	4	2	1	1	1	1	2	1	5	2	2	2	2	2	2	1	1	2
65	2	1	1	1	2	500	1	2	1	1	1	1	1	1	6	2	1	1	1	1	1	1	2
25	1	6	1	1	4	300	4	4	1	1	1	1	1	1	6	2	2	2	2	2	1	1	1	1
34	1	6	1	1	1	2575	4	5	2	2	1	2	1	2	2	2	2	2	2	1	1	1	1	1
80	1	2	4	1	3	200	4	2	2	2	1	2	2	2	1	2	1	2	1	2	1	1	1	2
70	1	2	1	1	3	300	4	2	2	2	1	2	2	2	1	2	2	2	2	1	1	1	2
38	1	3	1	1	1	1900	1	4	1	2	1	1	1	1	5	2	2	1	2	1	1	1	2
76	1	1	4	1	3	300	4	1	2	2	1	2	2	2	1	2	1	2	1	2	1	1	1	2
70	1	1	1	1	3	500	3	2	1	1	1	1	1	1	6	2	1	1	1	1	1	2	1	2
45	1	6	1	1	1	5000	1	7	1	1	1	1	1	1	6	2	1	1	1	1	1	1	1	1
25	2	5	1	1	2	1600	3	4	1	2	1	1	2	1	5	1	2	1	1	1	1	1	2
36	1	1	4	1	4	800	3	3	2	2	2	2	2	2	0	2	2	2	2	2	1	2	1	2
20	1	5	1	1	5	300	1	1	1	2	1	1	2	1	4	2	2	2	2	2	1	1	2
58	1	5	1	1	3	3000	1	2	1	1	1	1	2	1	5	2	2	2	1	1	1	1	2
42	1	5	1	1	3	2000	1	5	1	1	1	1	2	1	5	2	2	2	1	1	1	1	2
55	1	2	1	1	3	700	3	1	1	2	1	1	1	1	5	2	2	1	1	1	1	1	2
52	1	1	1	1	3	1600	1	2	1	1	1	1	1	1	6	1	2	2	2	1	1	1	2
48	1	2	1	1	3	800	4	3	2	2	1	2	1	2	2	2	1	1	1	1	1	1	1	2
50	1	5	1	1	3	400	3	4	1	1	1	1	1	1	6	2	1	2	1	1	1	1	1	2
45	1	5	1	1	1	1000	1	6	1	2	1	1	1	1	5	1	1	1	2	1	1	1	2
30	2	2	1	1	1	700	1	3	1	1	1	1	2	1	5	2	2	2	1	1	1	1	2
49	2	5	1	1	2	1200	1	5	1	2	1	1	1	1	5	2	2	1	1	1	1	1	2
38	2	3	1	1	2	1200	1	3	1	1	1	1	1	1	6	2	1	2	2	1	1	1	2
40	1	3	1	1	1	2600	1	4	1	1	1	1	1	1	6	1	1	1	1	1	1	1	2
50	1	1	1	1	3	600	4	2	2	2	1	2	2	2	1	1	2	1	1	2	1	1	2
34	2	6	1	1	1	2400	1	2	1	2	1	1	2	1	4	1	2	2	2	2	1	1	1	2
62	2	2	1	1	2	700	1	3	1	2	1	1	2	1	4	1	1	2	1	1	1	1	2
57	2	6	1	1	1	3900	1	5	1	1	1	1	1	1	6	1	2	2	2	2	1	1	2
50	2	5	1	1	4	1429	1	2	1	1	1	1	2	1	5	1	1	1	1	2	1	1	2
62	1	5	1	1	2	1000	1	2	2	2	1	2	1	2	2	1	1	1	1	2	1	1	2
25	1	6	1	1	4	100	1	3	1	2	1	1	2	1	4	2	2	1	1	2	1	1	1	2
60	1	1	1	1	3	400	2	1	1	2	1	1	1	1	5	1	2	1	2	2	2	1	1	2
22	1	6	1	1	3	1200	1	2	1	2	1	1	1	1	5	2	2	2	2	1	2	1	2
26	2	6	1	1	1	4000	1	6	1	2	1	1	1	1	5	2	1	2	1	1	1	1	1	1
40	1	6	1	1	1	1500	1	6	1	1	1	1	1	1	6	1	1	1	2	2	1	1	1	2
40	1	5	1	1	2	500	3	6	1	1	1	1	2	1	5	2	2	2	2	2	1	1	1	2
29	1	6	1	1	1	1760	1	2	1	2	1	1	2	1	4	1	2	2	2	2	1	1	2
37	1	6	1	1	1	2806	1	2	1	2	1	1	1	1	5	2	2	1	1	2	2	1	2
30	1	6	1	1	1	3001	1	4	1	1	1	1	2	1	5	2	2	2	2	2	2	2	1	1
28	2	6	1	1	1	1400	2	1	2	1	1	2	1	2	4	1	2	2	1	2	1	1	2
55	2	5	1	1	1	2628	4	6	1	2	1	1	1	1	5	1	2	2	2	2	1	1	2
25	2	6	1	1	1	1680	3	1	1	2	1	1	2	1	4	2	2	2	1	1	1	1	2
43	2	3	4	1	4	2500	1	4	1	1	1	1	2	1	5	1	2	2	2	2	2	1	2
30	1	6	1	1	1	2000	1	3	1	2	2	1	2	1	3	1	2	1	1	2	1	1	2
50	2	4	4	1	4	1000	1	2	1	1	1	1	1	1	6	2	1	1	1	2	1	1	1	2
38	1	6	1	1	1	2500	1	3	1	1	1	1	2	1	5	2	2	1	2	2	2	1	2
26	1	6	1	1	1	1918	1	3	1	1	1	1	1	1	6	1	2	2	2	1	2	1	2
27	1	6	1	1	1	3000	1	4	2	2	1	2	1	2	2	1	1	1	1	2	1	1	1	2
45	2	6	1	1	1	4101	1	5	1	2	1	1	2	1	4	2	1	2	1	2	2	1	2
30	2	6	1	1	1	5000	1	3	1	1	1	1	2	1	5	2	2	2	2	2	2	1	2
55	1	2	1	1	3	500	1	4	2	1	1	2	1	2	3	1	2	2	2	1	2	2	2
45	1	1	1	1	3	280	3	1	2	1	2	2	2	2	1	1	2	2	2	1	2	1	2
30	1	2	1	1	2	900	1	2	2	1	2	2	2	2	1	2	2	2	2	1	2	1	2
35	1	1	1	1	3	1200	1	5	1	1	1	1	2	1	5	2	2	1	1	2	1	1	1	2
33	1	6	1	1	1	2264	1	4	2	2	1	2	2	2	1	1	2	1	1	2	1	1	2
27	1	3	4	1	1	800	1	2	1	2	2	1	2	1	3	1	1	1	1	1	1	1	2	1
28	1	6	1	1	1	2197	1	2	1	1	1	1	2	1	5	2	1	1	1	1	2	1	2
28	1	6	1	1	1	1800	1	3	1	1	1	1	2	1	5	2	2	2	2	1	2	1	2
35	2	1	1	1	2	3000	1	1	2	2	2	2	2	2	0	1	1	1	1	2	1	1	1	2
29	2	3	1	1	5	300	1	1	1	2	1	1	2	1	4	2	1	1	1	2	1	1	2
23	1	5	1	1	3	1200	1	2	2	2	1	2	1	2	2	2	2	2	2	2	2	1	2
40	1	2	1	1	1	300	4	4	1	1	1	1	2	1	5	1	2	2	2	2	2	2	2
37	1	4	1	1	1	300	1	7	2	1	1	2	2	2	3	2	1	1	1	2	1	1	2
28	2	5	1	1	1	2000	1	3	1	1	1	1	2	1	5	2	2	2	2	2	2	1	2
33	1	5	1	1	4	500	1	6	2	2	1	2	2	2	1	1	2	1	1	1	1	1	1	2
63	2	4	1	1	1	2325	1	6	1	2	1	1	2	1	4	2	2	2	2	2	2	1	2
26	1	5	1	1	3	200	1	4	1	1	1	1	2	1	5	2	2	2	1	2	2	1	2
22	1	5	1	1	3	2200	1	2	1	1	1	1	1	1	6	1	2	2	2	2	2	1	2
38	1	5	1	1	3	500	3	1	1	1	1	1	2	1	5	2	2	2	2	1	2	1	2
32	1	6	1	1	1	700	1	5	1	1	1	1	1	1	6	2	2	2	2	2	2	1	2
42	2	2	2	1	4	2000	3	1	2	2	1	2	2	2	1	1	2	1	1	1	2	1	2
23	2	6	1	1	1	1510	3	1	1	1	1	1	2	1	5	1	2	2	2	2	2	1	2
27	2	6	1	1	1	2808	1	2	1	2	1	1	2	1	4	2	2	2	1	2	1	1	2
32	1	6	1	1	1	3128	1	3	2	2	1	2	2	2	1	1	1	1	1	2	1	1	2
40	2	5	4	1	4	2000	1	3	2	2	1	2	1	2	2	2	1	1	2	2	1	1	2
50	2	6	1	1	1	5081	1	6	1	1	1	1	1	1	6	2	1	1	1	2	1	1	1	1
68	1	1	1	1	3	500	3	2	2	2	1	2	2	2	1	2	2	2	2	2	2	1	2
40	2	5	1	1	1	300	1	1	1	1	1	1	1	1	6	2	1	1	1	2	1	1	1	1
35	2	2	1	1	2	500	1	3	1	1	1	1	1	1	6	2	2	2	2	2	2	1	2
27	1	5	1	1	3	2700	1	4	1	1	1	1	1	1	6	2	2	2	2	2	2	2	2
48	2	2	4	1	2	200	1	2	1	1	1	1	1	1	6	1	1	1	2	2	1	1	2
30	1	4	4	1	3	700	1	2	1	1	1	1	1	1	6	2	2	2	1	2	2	1	2
30	1	4	1	1	3	600	1	3	1	2	1	1	1	1	6	2	2	1	2	1	2	1	1	2
22	1	6	1	1	6	300	1	2	1	1	1	1	1	1	6	2	2	2	1	2	2	1	2
21	1	6	1	1	5	300	3	1	1	1	1	1	2	1	5	1	2	2	2	2	2	1	2
20	2	6	1	1	5	300	3	1	1	1	1	1	2	1	5	2	2	2	2	2	2	1	2
21	2	6	1	1	5	300	3	1	1	1	1	1	2	1	5	1	2	2	2	2	1	1	2
34	2	6	1	1	1	3000	1	1	1	1	1	1	2	1	5	2	2	2	1	2	2	1	2
31	1	6	1	1	1	3900	1	2	1	1	1	1	2	1	5	2	2	2	2	1	1	1	2
38	2	6	1	1	1	2000	1	4	1	1	1	1	2	1	5	1	2	1	1	1	1	1	2
34	1	6	1	1	1	2000	1	6	1	1	1	1	2	1	5	2	2	2	1	2	2	1	2
51	1	6	3	1	1	1600	1	6	1	1	1	1	1	1	6	2	2	2	2	1	2	1	1	1
20	1	5	1	1	5	300	1	2	1	1	1	1	2	1	5	2	2	2	2	2	2	1	2
34	2	6	1	1	1	2197	1	2	1	2	1	1	1	1	5	2	2	1	2	2	1	2	2
24	2	6	1	1	1	1916	3	1	1	1	1	1	2	1	5	2	2	2	1	2	2	1	2
34	1	2	1	1	2	1000	1	1	1	1	1	1	1	1	6	2	2	2	2	2	1	2	2
50	1	1	1	1	3	250	3	1	1	1	1	1	2	1	5	1	2	2	1	2	2	2	2
24	1	6	1	1	1	1900	3	1	2	2	1	2	1	2	2	2	1	2	2	2	1	2	2
60	2	1	1	1	2	200	1	4	2	2	2	2	1	2	1	2	1	2	2	2	2	2	2
67	1	1	1	1	3	250	3	3	1	1	1	1	2	1	5	1	2	2	2	2	2	2	2
23	1	5	1	1	3	1200	1	4	1	1	2	1	2	1	4	1	2	2	1	2	2	2	2
24	1	6	1	1	2	500	1	2	1	1	1	1	1	1	6	2	2	2	2	2	2	2	2
55	2	5	1	1	1	2628	4	6	1	2	1	1	1	1	5	1	2	2	1	2	1	1	2
38	2	5	1	1	3	1800	1	2	2	2	1	2	1	2	2	2	1	1	1	2	1	1	2
55	1	2	1	1	3	2100	1	4	1	2	1	1	1	1	5	1	1	1	2	2	1	1	1	2
65	1	1	1	1	3	800	4	1	1	2	1	1	1	1	5	2	1	1	1	2	1	1	2
56	1	1	1	1	3	1200	2	5	1	1	1	1	2	1	5	2	1	1	1	2	2	1	1	2
52	1	1	1	1	3	800	3	2	1	1	1	1	1	1	6	1	1	1	1	2	1	2	1	2
29	1	5	1	1	2	500	1	1	2	1	1	2	2	2	2	2	1	1	1	2	1	1	2
42	2	6	1	1	1	2600	1	6	1	2	1	1	2	1	4	2	2	2	2	1	2	1	2
30	1	5	1	1	3	200	1	3	2	2	1	2	2	2	1	2	1	1	2	2	1	1	2
32	1	6	1	1	1	2500	1	4	2	2	1	2	2	2	1	1	1	1	1	2	1	1	2
25	1	4	1	1	2	800	3	1	2	2	1	2	2	2	1	2	1	1	2	2	1	1	2
25	1	3	1	1	1	1300	1	2	1	1	1	1	2	1	5	1	2	2	2	2	2	1	2
24	1	3	1	1	5	200	3	1	2	2	1	2	2	2	1	2	1	1	1	2	1	1	2
25	2	6	1	1	1	3000	1	3	1	2	1	1	2	1	4	2	2	2	2	1	1	1	2
30	1	5	1	1	1	2300	1	3	1	1	1	1	1	1	6	1	1	1	1	2	1	1	1	1
30	2	6	1	1	1	3000	1	4	1	1	1	1	2	1	5	2	2	2	2	2	2	2	2
39	2	3	1	1	1	1400	1	1	1	2	1	1	2	1	4	1	1	1	1	2	1	1	1	2
20	1	5	1	1	5	200	3	1	1	1	1	1	2	1	5	2	2	2	1	1	1	1	1	2
30	1	1	1	1	4	1500	1	6	1	1	1	1	1	1	6	2	1	1	1	2	1	1	2
29	1	6	1	1	1	1400	1	4	1	1	1	1	1	1	6	1	1	1	1	1	2	1	2
63	2	6	1	1	1	2400	1	4	1	1	1	1	2	1	5	1	1	1	2	2	2	1	1	2
30	1	5	1	1	4	2000	1	5	1	1	1	1	2	1	5	2	1	1	1	2	1	1	2
36	1	5	1	1	3	1200	1	3	1	2	1	1	2	1	4	1	1	1	2	2	2	1	2
30	2	6	1	1	1	3000	1	4	1	1	1	1	2	1	5	1	2	2	2	1	2	2	2
28	1	6	1	1	1	3000	1	2	1	1	1	1	2	1	5	2	1	2	1	2	2	2	2
46	2	6	1	1	1	1700	4	3	1	2	1	1	2	1	4	1	1	1	1	2	2	1	1	2
28	1	3	1	1	4	1500	1	2	2	2	1	2	1	2	2	2	1	1	1	2	1	1	2
19	1	6	1	1	5	300	3	1	2	1	1	2	2	2	2	2	2	2	2	2	2	1	2
28	2	6	1	1	5	300	1	1	1	2	1	1	2	1	4	2	2	2	1	2	2	1	2
48	2	6	1	1	1	3100	1	3	1	1	1	1	2	1	5	1	2	1	2	2	2	2	2
65	2	4	4	1	4	1500	1	4	2	2	1	2	1	2	2	1	1	1	1	2	1	1	1	2
29	2	6	1	1	4	1200	1	2	1	1	1	1	2	1	5	2	2	2	2	1	1	1	2
32	2	6	1	1	1	3200	1	2	1	1	1	1	2	1	5	2	2	2	2	2	1	1	2
22	2	6	1	1	1	1743	3	1	1	1	1	1	2	1	5	2	2	2	2	2	1	1	2
30	1	6	1	1	1	1703	1	3	1	1	1	1	2	1	5	2	2	2	1	2	1	1	2
20	2	6	1	1	1	1500	3	2	1	1	1	1	2	1	5	2	2	1	2	2	1	1	2
24	2	6	1	1	1	1305	3	1	1	1	1	1	2	1	5	2	2	2	2	2	1	1	1	1
39	1	6	1	1	1	4500	1	4	1	1	1	1	2	1	5	2	2	2	2	2	1	1	1	1
38	1	6	1	1	1	2300	1	4	1	2	1	1	1	1	5	2	2	2	1	2	1	1	2
46	1	6	1	1	1	1900	1	3	2	2	1	2	1	2	2	2	2	1	2	1	1	1	2
